# Supplementary material for: Simultaneous determination of daidzein, its prodrug and major conjugative metabolites in rat plasma and application in a pharmacokinetic study
Source: Royal Society of Chemistry journal article supplement (doi:10.1039/d2nj02690b), 2022-01-01
Supplement: d2nj02690b1.pdf [file d2nj02690b1.pdf]

1 **Electronic Supplementary Material (ESI) for New Journal of Chemistry.**

2 **Simultaneous determination of daidzein, its prodrug and major conjugative metabolites in rat**  
3 **plasma and application in a pharmacokinetic study**

4 **Authors:**

5 Yingchao Li<sup>1</sup>, Xiaoyu Liu<sup>1</sup>, Farong Lu<sup>1</sup>, Jiaming Zhang<sup>1</sup>, Yawei Zhang<sup>1</sup>, Wenchao Li<sup>1</sup>, Tianhong  
6 Zhang<sup>1\*</sup>

7 **Affiliation:**

8 <sup>1</sup>Wuya College of Innovation, Shenyang Pharmaceutical University, Shenyang 110016, PR China

9

10 **\*Correspondence:**

11 Dr. Tianhong Zhang, Wuya College of Innovation, Shenyang Pharmaceutical University, Shenyang  
12 Liaoning Province, 110016, P. R. China

13 E-mail address: zhangth1058@aliyun.com

14 Tel: +86-24-23984159. Fax: +86-24-23986321.

15

16 **Abbreviations:** DAN, daidzein; 4'-I-P, 4'-O-L-isoleucyl carbamate prodrug of daidzein;  
17 DAN-7-4'-DS, daidzein-7-4'-disulfate; DAN-7-G, daidzein-7-O-glucuronide; LLOQ, lower limit of  
18 quantification; CID, collision-induced dissociation; PPT, protein precipitation; SD, Sprague-Dawley;  
19 MRM, multiple reaction monitoring; QC, quality control; ESI, electrospray ionization.

20

21 **Keywords:** daidzein; prodrug; metabolites; HPLC–MS/MS; pharmacokinetic study.

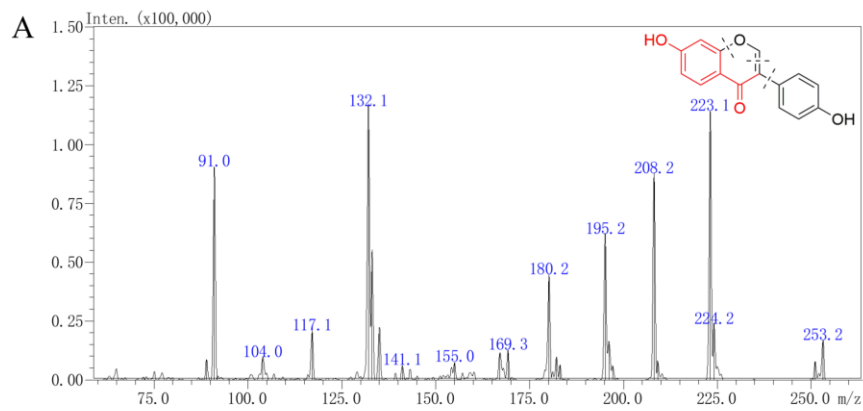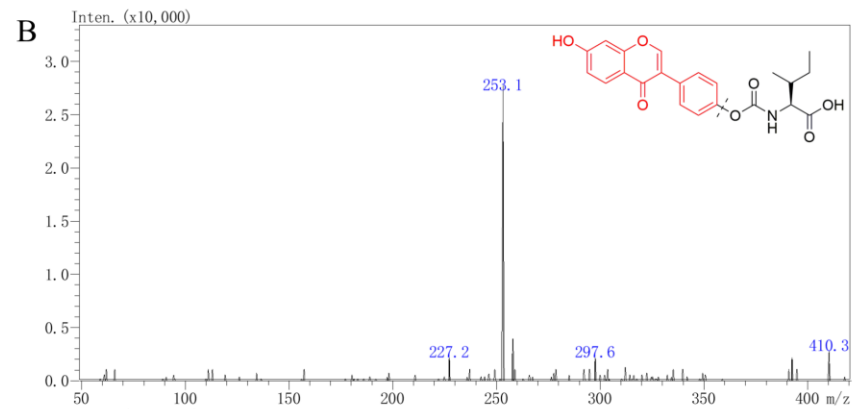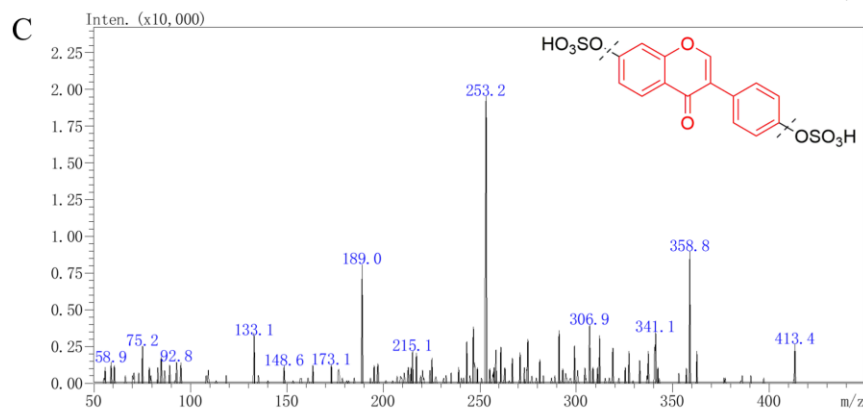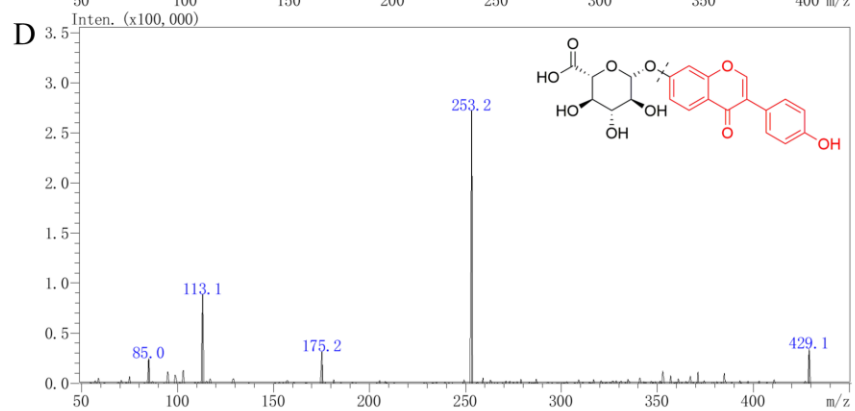

22

23

**Fig. S1** Full scan product ion mass spectrum of (A) DAN, (B) 4'-I-P, (C) DAN-7-4'-DS and (D) DAN-7-G in negative mode.

24 **Table S1** Gradient time table for HPLC-MS/MS method. Mobile phase A was water containing 5 mM  
25 ammonium acetate adjusted to pH 4.2 with acetic acid. Mobile phase B was acetonitrile.

26

| Time (min) | Flow rate (mL/min) | A % | B % |
|------------|--------------------|-----|-----|
| 0.00       | 0.3                | 90  | 10  |
| 4.50       | 0.3                | 18  | 82  |
| 4.70       | 0.3                | 90  | 10  |
| 6.20       | 0.3                | 90  | 10  |

**Table S2** The precision and trueness values of the analytes for dilution integrity (mean  $\pm$  SD., n = 6).

| Analytes  | Added concentration (ng/mL) | Dilution times | Found concentration (ng/mL) | Accuracy RSD (%) | Precision RE (%) |
|-----------|-----------------------------|----------------|-----------------------------|------------------|------------------|
| DAN       | 2000                        | 2.5            | 750.6 $\pm$ 19.5            | 2.7              | -6.2             |
|           | 4000                        | 5              | 770.7 $\pm$ 34.4            | 4.5              | -3.7             |
| 4'-I-P    | 10000                       | 2.5            | 4096 $\pm$ 122              | 3.0              | 2.5              |
|           | 20000                       | 5              | 4156 $\pm$ 214              | 5.2              | 4.0              |
| D-7-4'-DS | 10000                       | 2.5            | 4298 $\pm$ 156              | 3.7              | 7.5              |
|           | 20000                       | 5              | 4152 $\pm$ 69               | 1.7              | 3.8              |
| D-7-G     | 10000                       | 2.5            | 4206 $\pm$ 282              | 6.8              | 5.2              |
|           | 20000                       | 5              | 4062 $\pm$ 211              | 5.2              | 1.6              |

**Table S3** Stability of DAN, 4'-I-P, DAN-7-4'-DS and D-7-G in rat plasma under different storage conditions (mean  $\pm$  SD., n = 3).

| Analytes  | Nominal<br>(ng/mL) | Room temperature for 4 h |         | Pretreatment for 8 h |         | three freeze–thaw cycles |         | -80°C frozen storage 30 days |         |
|-----------|--------------------|--------------------------|---------|----------------------|---------|--------------------------|---------|------------------------------|---------|
|           |                    | Measured<br>(ng/mL)      | RSD (%) | Measured<br>(ng/mL)  | RSD (%) | Measured<br>(ng/mL)      | RSD (%) | Measured<br>(ng/mL)          | RSD (%) |
| DAN       | 1.600              | 1.638 $\pm$ 0.106        | 6.5     | 1.600 $\pm$ 0.092    | 5.8     | 1.649 $\pm$ 0.104        | 3.3     | 1.538 $\pm$ 0.160            | 11      |
|           | 40.00              | 36.47 $\pm$ 0.93         | 2.6     | 36.52 $\pm$ 0.94     | 3.6     | 37.07 $\pm$ 0.96         | 2.9     | 37.34 $\pm$ 1.40             | 3.8     |
|           | 800                | 711.8 $\pm$ 14.0         | 2.0     | 724.7 $\pm$ 10.46    | 1.5     | 706.1 $\pm$ 17.0         | 2.5     | 737.7 $\pm$ 19.0             | 2.6     |
| 4'-I-P    | 8.00               | 7.917 $\pm$ 0.620        | 7.9     | 7.842 $\pm$ 0.355    | 4.6     | 8.31 $\pm$ 0.56          | 6.8     | 8.07 $\pm$ 0.40              | 5.1     |
|           | 200.0              | 183.3 $\pm$ 10.5         | 5.8     | 187.3 $\pm$ 11.74    | 6.3     | 200.6 $\pm$ 15.6         | 7.9     | 214.6 $\pm$ 7.05             | 3.3     |
|           | 4000               | 4132 $\pm$ 175           | 4.3     | 4218 $\pm$ 316       | 7.5     | 3893 $\pm$ 333           | 9       | 4182 $\pm$ 225               | 5.4     |
| D-7-4'-DS | 8.00               | 7.727 $\pm$ 0.371        | 4.9     | 8.64 $\pm$ 0.159     | 1.9     | 7.837 $\pm$ 0.886        | 12      | 7.879 $\pm$ 0.700            | 9       |
|           | 200.0              | 202.7 $\pm$ 5.6          | 2.8     | 213.7 $\pm$ 6.2      | 2.9     | 201.2 $\pm$ 15.8         | 7.9     | 199.5 $\pm$ 9.9              | 5.0     |
|           | 4000               | 4369 $\pm$ 189           | 4.4     | 4132 $\pm$ 299       | 7.3     | 4396 $\pm$ 197           | 4.5     | 4346 $\pm$ 143               | 3.3     |
| D-7-G     | 8.00               | 8.20 $\pm$ 0.34          | 4.2     | 7.401 $\pm$ 0.449    | 6.1     | 8.38 $\pm$ 0.66          | 7.9     | 8.01 $\pm$ 0.62              | 7.8     |
|           | 200.0              | 183.1 $\pm$ 8.0          | 4.4     | 180.6 $\pm$ 8.4      | 4.7     | 176.2 $\pm$ 2.6          | 1.5     | 183.3 $\pm$ 11.1             | 6.1     |
|           | 4000               | 4297 $\pm$ 172           | 4.1     | 3862 $\pm$ 242       | 6.3     | 4284 $\pm$ 193           | 4.6     | 4253 $\pm$ 304               | 7.2     |
